# Supplementary material for: Impact of hole-transport layer materials on the field-induced degradation of p-i-n perovskite solar cells
Source: Royal Society of Chemistry journal article supplement (doi:10.1039/d3se01458d), 2024-01-01
Supplement: d3se01458d1.pdf [file d3se01458d1.pdf]

## Supporting Information

### Impact of the hole-transport layer materials on the field-induced degradation of p-i-n perovskite solar cells

Victoria V. Ozerova <sup>a</sup>, Nikita A. Emelianov <sup>a</sup>, Lyubov A. Frolova <sup>a</sup>, Yuri S. Fedotov <sup>a,b</sup>, Sergey I. Bredikhin <sup>b</sup>, Sergey M. Aldoshin <sup>a</sup> and Pavel A. Troshin <sup>c,a</sup>

<sup>a</sup> Federal Research Center of Problems of Chemical Physics and Medicinal Chemistry, Russian Academy of Sciences, Academician Semenov Prospect 1, 141432 Chernogolovka, Moscow Region, Russia.

<sup>b</sup> Institute of Solid State Physics, Russian Academy of Sciences, Chernogolovka, 142432 Moscow Region, Russia.

<sup>c</sup> Zhengzhou Research Institute, Harbin Institute of Technology, 26 Longyuan East 7th, Jinshui District, Zhengzhou, Henan Province, 450000, China.

#### Table of contents

Experimental section

**Table S1.** The techniques and conditions used for deposition of HTM films.....2

**Figure S1.** Top view optical images of the metal electrodes in ITO/NiO<sub>x</sub>/Cs<sub>0.15</sub>FA<sub>0.85</sub>PbI<sub>3</sub>/PC<sub>61</sub>BM/Mg/Ag devices recorded after ToF SIMS measurements on the non-exposed to bias device (a) and the device exposed to 1.0 V for 1800 h (b).....3

**Table S1. The techniques and conditions used for deposition of HTM films**

| HTM              | Deposition technique | Conditions                                                                                                                                                                                                                                                                                                                     |
|------------------|----------------------|--------------------------------------------------------------------------------------------------------------------------------------------------------------------------------------------------------------------------------------------------------------------------------------------------------------------------------|
| PEDOT:PSS        | Spin-coating         | A thin layer of PEDOT: PSS (Clevios, PH 1000) was prepared by spin-coating the PEDOT: PSS solution filtered through a 0.45 $\mu\text{m}$ poly(tetrafluoroethylene) (PTFE) filter at 3000 rpm for 40 s on the cleaned ITO substrates. Subsequently, PEDOT: PSS films was baked at 165 $^{\circ}\text{C}$ for 15 min in the air. |
| PTAA             | Spin-coating         | 2.5 mg/ml solution in chlorobenzene, 4500 rpm, glove box                                                                                                                                                                                                                                                                       |
| NiO <sub>x</sub> | Spin-coating         | A colloidal solution of NiO <sub>x</sub> nanoparticles ( $\sim 3$ mg/ml) was deposited at 6000 rpm for 30 s and the resulting film was annealed at 150 $^{\circ}\text{C}$ for 15 min. in air.                                                                                                                                  |

***a***

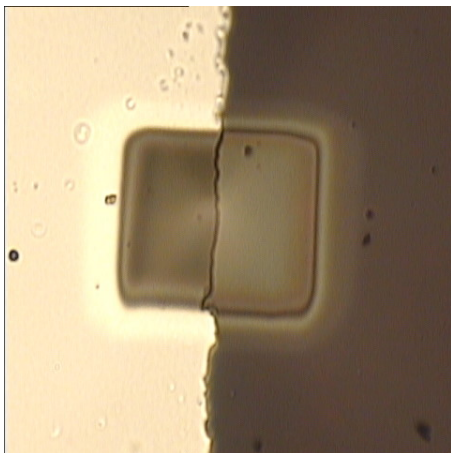

***b***

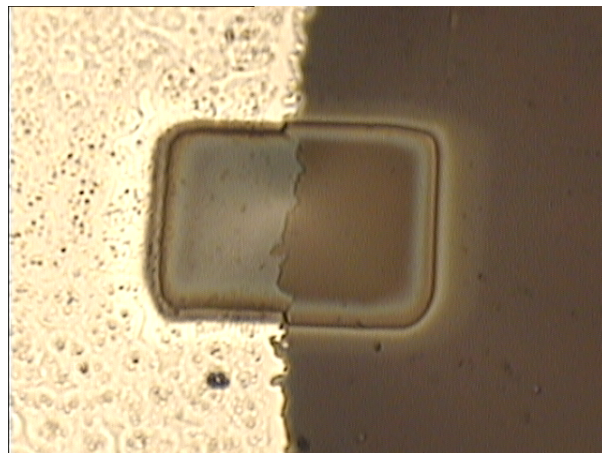

**Figure S1.** Top view optical images of the metal electrodes in ITO/NiO<sub>x</sub>/Cs<sub>0.15</sub>FA<sub>0.85</sub>PbI<sub>3</sub>/PC<sub>61</sub>BM/Mg/Ag devices recorded after ToF SIMS measurements on the non-exposed to bias device (a) and the device exposed to 1.0 V for 1800 h (b).
